# Supplementary material for: Subtype and cell type specific expression of lncRNAs provide insight into breast cancer
Source: PubMed Central journal article supplement (PMC9388662; doi:10.1038/s42003-022-03559-7), 2022-08-18
Supplement: 42003_2022_3559_MOESM1_ESM.pdf [file 42003_2022_3559_MOESM1_ESM.pdf]

## Description of Additional Supplementary Files

**File name:** Supplementary Data 1

**Description:** Underlying data Fig. 1 and Supp.Fig 3.

**File name:** Supplementary Data 2

**Description:** Survival analysis.

**File name:** Supplementary Data 3

**Description:** Underlying data Fig. 2a-d.

**File name:** Supplementary Data 4

**Description:** Underlying data Fig. 2e-g.

**File name:** Supplementary Data 5

**Description:** lncRNAs associated to breast cancer cell lines.

**File name:** Supplementary Data 6

**Description:** Underlying data Fig. 4b-g.

**File name:** Supplementary Data 7

**Description:** Underlying data Fig. 5.

**File name:** Supplementary Data 8

**Description:** Sample IDs used in analysis.

**File name:** Supplementary Data 9

**Description:** SCAN-B kallisto TPM values.

**File name:** Supplementary Data 10

**Description:** TCGA-BRCA kallisto TPM values.
